# Supplementary material for: Estimating utilities for chronic kidney disease, using SF-36 and SF-12-based measures: challenges in a population of veterans with diabetes
Source: Springer Nature journal article supplement (doi:10.1007/s11136-012-0139-1), 2012-03-06
Supplement: MOESM1 [file 5715164]

**SupplementaryTable 1. ICD-9 diagnosis and procedure codes used to determine dominant conditions**

| **Dominant Medical Conditions** | **International Classification of Diseases and Procedures, Ninth revision, Clinical Modification codes (ICD-9CM)** |
| --- | --- |
| End-stage hepatic disease | 456.0, 456.1, 456.2, 456.20, 456.21, 572.2,572.3, 572.4, 572.8, 571.xx |
| Cancer (excludes ‘Other malignant skin cancers’ and malignant cancer of prostate) | 140.xx, 141.xx, 142.xx, 143.xx, 144.xx, 145.xx, 146.xx, 147.xx, 148.xx, 149.xx, 150.xx, 151.xx, 152.xx, 153.xx, 154.xx, 155.xx, 156.xx, 157.xx, 158.xx, 159.xx, 160.xx, 161.xx, 162.xx, 163.xx, 164.xx, 165.xx, 166.xx, 167.xx, 168.xx, 169.xx, 170.xx, 171.xx, 172.xx, 174.xx, 175.xx, 176.xx, 177.xx, 178.xx, 179.xx, 180.xx, 181.xx, 182.xx, 183.xx, 184.xx, 186.xx, 187.xx, 188.xx, 189.xx, 190.xx, 191.xx, 192.xx, 193.xx, 194.xx, 195.xx, 196.xx, 197.xx, 198.xx, 199.xx, 200.xx, 201.xx, 202.xx, 203.xx, 204.xx, 205.xx, 206.xx, 207.xx, 208.xx |
| Amputations | 84.11, 84.12, 84.13, 84.14, 84.15, 84.16, 84.17, 84.18, 84.19 |
| Advanced retinopathy | 362.02, 369.0x, 369.1x, 369.2x, 369.3x, 369.4x |
| Dementia | 290.0x, 290.10, 290.11, 290.12, 290.13, 290.2x, 290.21, 290.3, 290.40, 290.41, 290.42, 290.43, 291.2x, 294.10, 294.11, 294.8x, 331.0x, 331.1x, 331.2x, 331.7x, 331.89, 331.9x, 331.82, 332.0x, 046.1x, 046.3x, 094.1x, 292.82, 310.9x |
| Pre-dementia/cognitive impairment | 294, 294.1, 292.83, 294.9, 331.83, 780.93438.xx, 333.0x, 333.4x, 331.5x |

**Supplementary Table 2. ICD-9 codes used for diabetes-related and non-diabetes-related disease conditions**

| **Medical Condition** | **International Classification of Diseases, Ninth revision, Clinical Modification codes (ICD9-CM)** |
| --- | --- |
| Diabetes-related | |
| *Macrovascular* |  |
| -- Coronary artery disease (CAD) | 410, 410.0, 410.1, 410.2, 410.3, 410.4, 410.5, 410.6, 410.7, 410.8, 410.9, 411, 411.0, 411.1, 411.8, 411.81, 411.89, 412, 413, 413.0, 413.1, 413.9, 414, 414.0, 414.00, 414.01, 414.02, 414.03, 414.04, 414.05, 414.1, 414.10, 414.11, 414.19, 414.8, 414.9 |
| -- Congestive heart failure (CHF) | 402.01, 402.11, 402.91, 404.01, 404.11, 404.91, 428, 428.0, 428.1, 428.9 |
| -- Arrhythmia | 423, 423.0, 423.1, 423.2, 423.8, 423.9, 427.31 |
| -- Cerebrovascular disease (CVD) | 431, 433.01, 433.11, 433.21, 433.31, 433.81, 433.91, 434.01, 434.11, 434.91, 435, 435.0, 435.1, 435.2, 435.3, 435.8, 435.9, 438, 438.0, 438.1, 438.11, 438.12, 438.2, 438.3, 438.4, 438.5, 438.50, 438.51, 438.52, 438.53, 438.8, 438.81, 438.82, 438.89, 438.9 |
| -- Peripheral vascular disease (PVD) | 250.7, 440.2, 440.20, 440.21, 440.22, 440.23, 440.24, 440.29, 440.8, 440.9, 442.2, 442.3, 443, 443.0, 443.1, 443.8, 443.81, 443.89, 443.9, 444.22, 444.81 |
| -- PVD Gangrene | 785.4 |
| *Microvascular* |  |
| -- Renal disease | 403.11, 403.91, 404.12, 404.13, 404.92, 404.93, 585, 586, 587, 274.1, 274.10, 274.11, 274.19, 403.10, 403.90, 404.10, 404.11, 404.90, 404.91, 581, 581.0, 581.1, 581.2, 581.3, 581.8, 581.9, 582, 582.0, 582.1, 582.2, 582.4, 582.8, 582.81, 582.89, 582.9, 583, 583.0, 583.1, 583.2, 583.4, 583.6, 583.7, 583.8, 583.81, 583.89, 583.9, 590.0, 590.00, 590.01, 593.6, 593.9, 753.12, 753.13, 753.14, 250.4, 250.40, 250.41, 250.42, 250.43, 403.00, 403.01, 404.00, 404.01, 404.02, 404.03, 405.01, 453.3, 584, 584.5, 584.6, 584.7, 584.8, 584.9, 580, 580.0, 580.4, 580.8, 580.81, 580.89, 580.9, 590.1, 590.10, 590.11, 590.2, 590.3, 590.8, 590.80, 590.81, 593.81, 866, 866.0, 866.00, 866.01, 866.02, 866.03, 866.1, 866.10, 866.11, 866.12, 866.13 |
| -- Diabetic retinopathy | 250.50, 250.51, 250.52, 250.53, 362.0, 362.01, 362.02 |
| -- Lower extremity complications | 681.10, 681.11, 682.7, 700.xx, 707.1, 730.76, 730.77 |
| *Metabolic disorders* |  |
| -- Uncontrolled DM | 250.02, 250.03 |
| -- Short-term DM | 250.10, 250.11, 250.12, 250.13, 250.20, 250.21, 250.22, 250.23, 250.30, 250.31, 250.32, 250.33 |
| Non-diabetes-related | |
| *Gastrointestinal (GI)* |  |
| -- Upper GI | 530.1x, 530.2x, 530.3x, 530.81, 531.xx, 532.xx, 533.xx, 534.xx |
| -- Lower GI | 555.xx, 556.xx, 562.11,562.13 |
| -- Hepatic/ biliary | 574.xx, 575.xx, 576.xx, 070.xx |
| *Pulmonary* | 490.xx, 491.xx, 492.xx, 493.xx, 495.xx, 496.xx, 500.xx, 501.xx, 502.xx, 503.xx, 504.xx, 505.xx, 506.4 |
| *Musculoskeletal* | 274.xx, 712.xx, 719.05, 719.15, 719.25, 719.35, 719.45, 719.55, 719.65, 719.75, 719.85, 719.95, 726.5, 733.14, 733.15, 733.42, 820.xx, 720.xx, 721.3x,721.42,722.10,722.52,722.73, 722.83, 722.93, 724.02, 724.2x, 724.3x, 724.4x, 724.5x, 724.6x, 724.7x, 724.8x, 724.9x, 715.xx, 716.xx, 714.xx, 710.0x, 710.1x, 710.4x, 725.xx |
| *Neurological* | 340.xx, 332.xx, 342.xx, 343.1x, 344.1x, 359.xx, 344.00, 344.01, 344.02, 344.03, 344.04, 344.09, 806.00, 806.01, 806.02, 806.03, 806.04, 806.05, 806.06, 806.07, 806.08, 806.09, 806.1, 952.0, 345.xx, 536.3x |
| *Mental illness & substance abuse* |  |
| -- Mental Illness (major) | 295.xx, 296.0,296.1,296.4,296.5,296.6,296.7,296.8,296.9, 296.2x, 296.3x, 297.xx, 298.xx, 299.xx, 309.81 |
| -- Mental Illness (other) | 300.0x, 300.2x, 300.3x, 311, 300.4x |
| -- Substance abuse | 303.xx, 305.0x, 304.9x, 305.2x, 305.3x, 305.4x, 305.5x,, 305.6x, 305.7x, 305.8x, 305.9x |
| *Other* | 369.6x, 369.7x, 369.8x, 369.9x, 042 |

**Supplementary table 3. Distribution of Utility Estimates by Method**

|  | **Utility estimate** | | | | | |
| --- | --- | --- | --- | --- | --- | --- |
| **Percentile** | **A: SF-12 🡪 EQ-5D** | **B: SF-36 🡪 HUI2** | **C: SF-12 🡪 SF-6D** | **D: SF-36 🡪 SF-6D** | **E: SF-36 🡪 SF-6D (Bayesian)** | **F: SF-12 🡪 VR-6D** |
| Recent-onset diabetes | | | | | | |
| **100% Max** | 0.99 | 1.02 | 1.00 | 1.00 | 1.00 | 1.10 |
| **99%** | 0.93 | 0.97 | 0.92 | 0.92 | 0.89 | 0.88 |
| **95%** | 0.90 | 0.91 | 0.92 | 0.85 | 0.78 | 0.82 |
| **90%** | 0.87 | 0.87 | 0.86 | 0.79 | 0.71 | 0.77 |
| **75%** | 0.80 | 0.77 | 0.72 | 0.68 | 0.64 | 0.67 |
| **50% Median** | 0.72 | 0.64 | 0.61 | 0.59 | 0.57 | 0.58 |
| **25%** | 0.64 | 0.53 | 0.52 | 0.51 | 0.48 | 0.50 |
| **10%** | 0.58 | 0.43 | 0.45 | 0.45 | 0.40 | 0.43 |
| **5%** | 0.55 | 0.38 | 0.41 | 0.39 | 0.33 | 0.39 |
| **1%** | 0.52 | 0.30 | 0.35 | 0.32 | 0.24 | 0.32 |
| **0% Min** | 0.45 | 0.25 | 0.35 | 0.30 | 0.20 | 0.30 |
| Prevalent diabetes | | | | | | |
| **100% Max** | 0.98 | 1.02 | 1.00 | 1.00 | 1.00 | 1.01 |
| **99%** | 0.92 | 0.96 | 0.92 | 0.89 | 0.87 | 0.88 |
| **95%** | 0.89 | 0.90 | 0.86 | 0.83 | 0.75 | 0.80 |
| **90%** | 0.85 | 0.85 | 0.80 | 0.76 | 0.69 | 0.75 |
| **75%** | 0.78 | 0.75 | 0.69 | 0.66 | 0.63 | 0.66 |
| **50% Median** | 0.70 | 0.63 | 0.59 | 0.58 | 0.56 | 0.57 |
| **25%** | 0.63 | 0.52 | 0.52 | 0.51 | 0.48 | 0.50 |
| **10%** | 0.58 | 0.43 | 0.44 | 0.44 | 0.39 | 0.43 |
| **5%** | 0.55 | 0.38 | 0.41 | 0.39 | 0.33 | 0.39 |
| **1%** | 0.52 | 0.30 | 0.35 | 0.32 | 0.24 | 0.32 |
| **0% Min** | 0.44 | 0.25 | 0.35 | 0.30 | 0.20 | 0.29 |
